# Supplementary material for: Rates of turnover among general practitioners: a retrospective study of all English general practices between 2007 and 2019
Source: PubMed Central journal article supplement — BMJ Open. 2021 Aug 12;11(8):e049827. doi: 10.1136/bmjopen-2021-049827 (PMC8362689; doi:10.1136/bmjopen-2021-049827), 2021-08-12
Supplement: bmjopen-2021-049827supp001.pdf [file bmjopen-2021-049827supp001.pdf]

## Supplementary material for “Rates of turnover among general practitioners in England between 2007-2019: a retrospective study”.

Supplementary Figure 1: Flow chart showing the data process

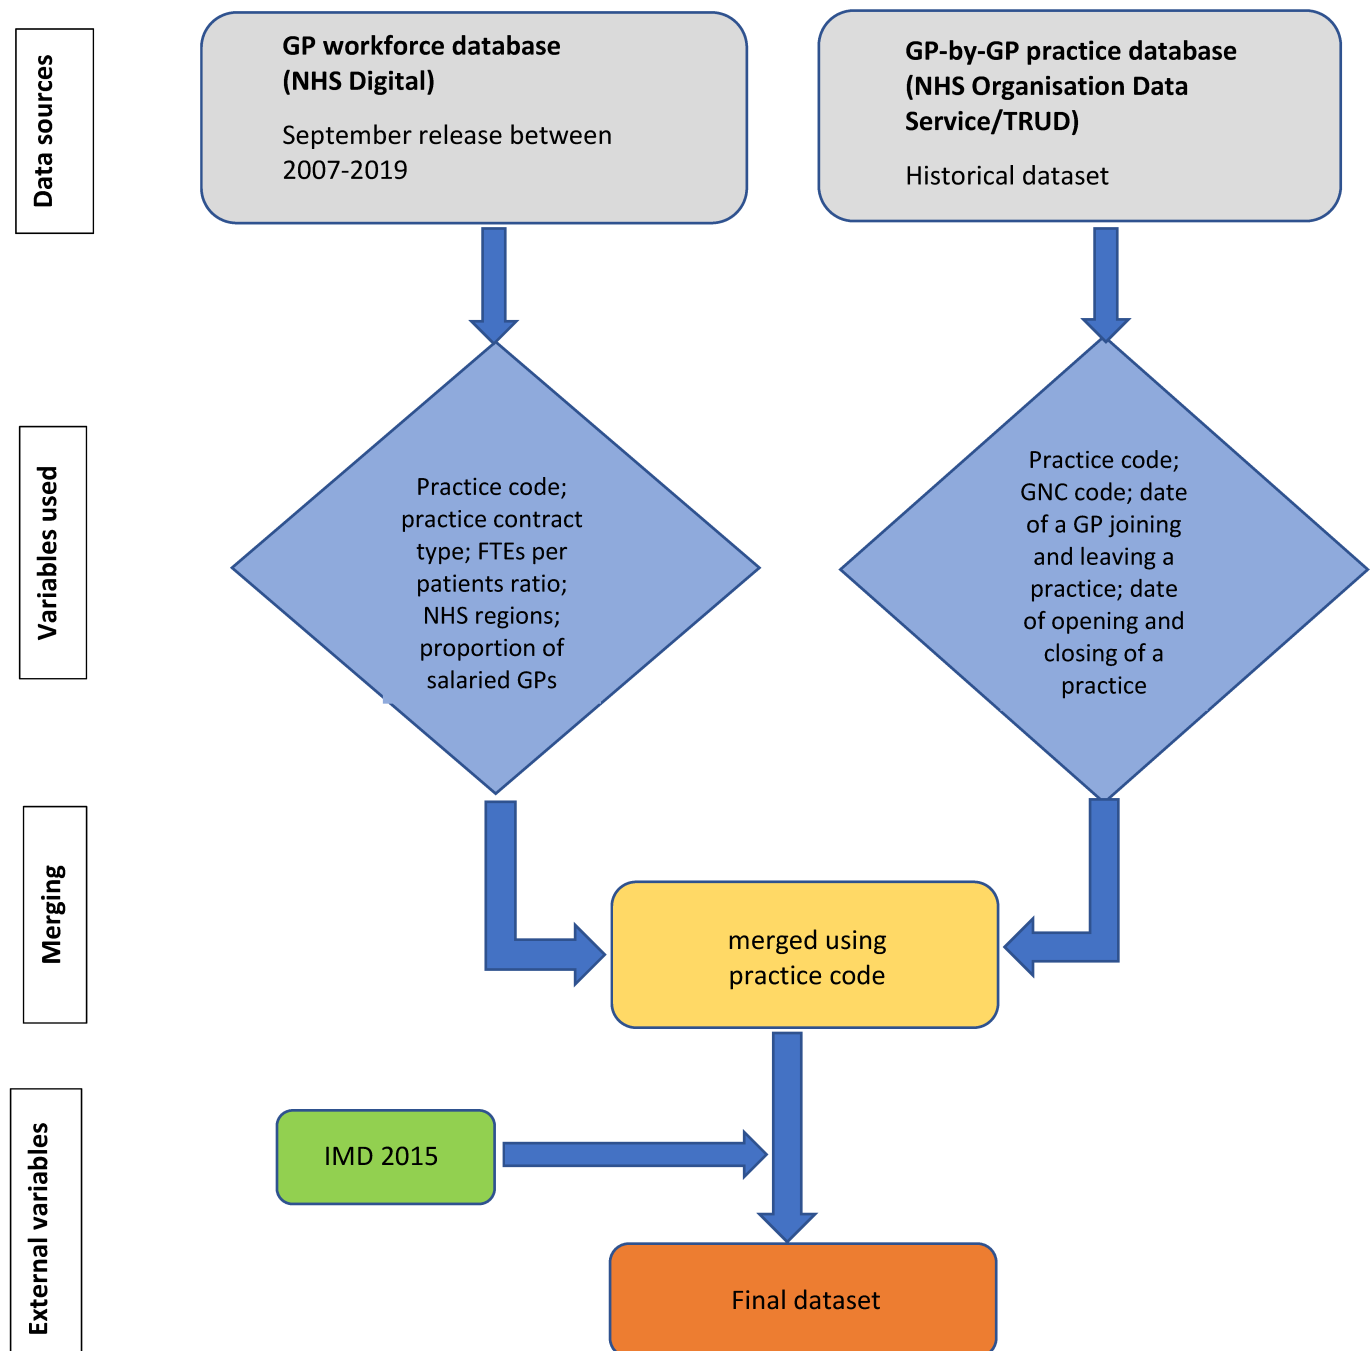

**Supplementary Figure 2: Violin plot for general practitioner (GP) turnover rates between 2007 and 2019**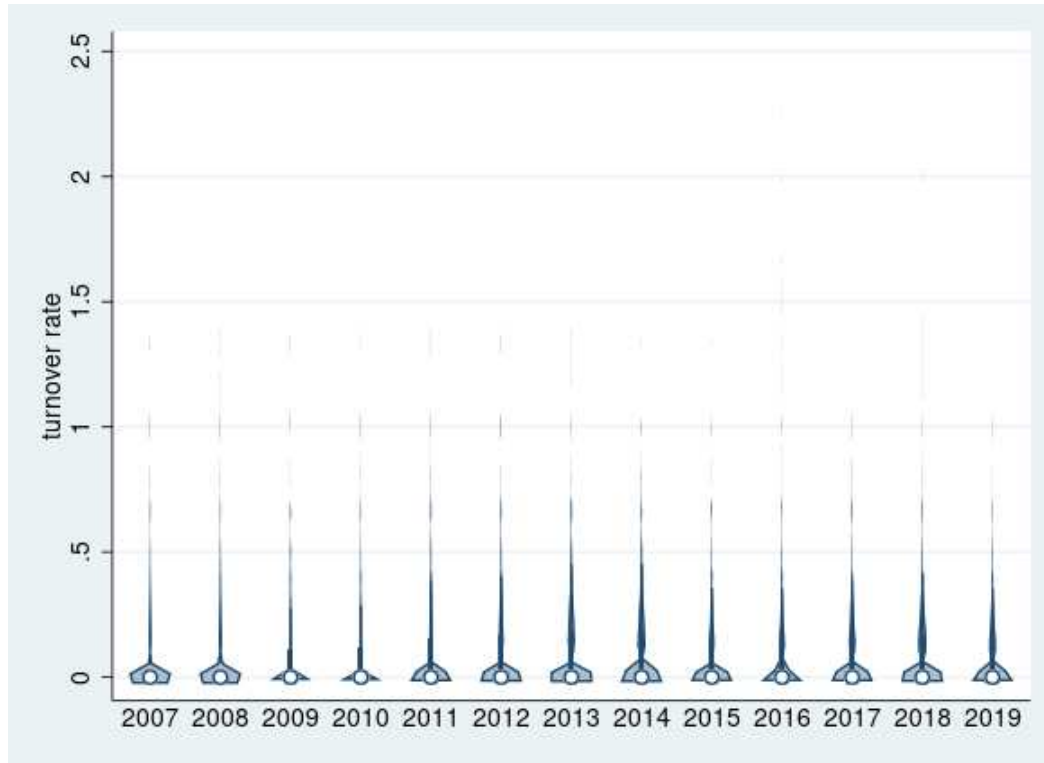

Note: Turnover rate on the y-axis have not been multiplied by 100.

## GP Joiners' and retention rates

### Definition of GP joiners' and retention rates

Two additional measures were calculated in order to quantify trends of general practitioners (GPs) and their attitude in leaving general practices, joiners' and retention rates, which describe the proportion of GPs who join a practice during the year and the proportion of GPs who stay in a practice for entire year, respectively.

The following definitions of GPs joiners' rates were used:

$$\text{Joiners' rate} = \frac{\text{GPs in a practice who join during the year}}{\text{*Average number of GPs during the year}} \times 100$$

Where:

Average number of GPs in a year= *(GPs in a practice at the start of the year + GPs in a practice at the end of the year)/2*; and

GPs in a practice at the end of the year= *Number of GPs at start of the year + Number of joiners – Number of leavers*

The following definitions of GPs retention rates was used. Retention did not account for GPs who may join during the year.

$$\text{Retention rate} = \frac{\text{GPs in a practice who stay the entire year}}{\text{GPs at the start of the year}} \times 100$$

**Supplementary Table 1. GP joiners' rate between 2007 and 2019.**

| year | N practices | Mean | SD   | Median | IQR  | 25th percentile | 75th percentile |
|------|-------------|------|------|--------|------|-----------------|-----------------|
| 2007 | 8085        | 9.4  | 20.3 | 0.0    | 12.5 | 0.0             | 12.5            |
| 2008 | 8053        | 9.4  | 20.0 | 0.0    | 11.8 | 0.0             | 11.8            |
| 2009 | 8077        | 10.7 | 21.6 | 0.0    | 15.4 | 0.0             | 15.4            |
| 2010 | 8058        | 11.1 | 21.2 | 0.0    | 16.7 | 0.0             | 16.7            |
| 2011 | 8009        | 11.8 | 21.4 | 0.0    | 18.2 | 0.0             | 18.2            |
| 2012 | 7924        | 13.2 | 21.9 | 0.0    | 20.0 | 0.0             | 20.0            |
| 2013 | 7809        | 15.0 | 23.3 | 0.0    | 23.5 | 0.0             | 23.5            |
| 2014 | 7629        | 13.7 | 22.3 | 0.0    | 22.2 | 0.0             | 22.2            |
| 2015 | 7404        | 11.1 | 20.6 | 0.0    | 16.0 | 0.0             | 16.0            |
| 2016 | 7211        | 11.6 | 19.7 | 0.0    | 18.2 | 0.0             | 18.2            |
| 2017 | 6963        | 12.3 | 20.2 | 0.0    | 18.2 | 0.0             | 18.2            |
| 2018 | 6757        | 13.6 | 20.6 | 0.0    | 21.4 | 0.0             | 21.4            |
| 2019 | 6598        | 11.4 | 18.9 | 0.0    | 18.2 | 0.0             | 18.2            |

**Supplementary Table 2: GP retention rates between 2007 and 2019.**

| Year | N practices | Mean | SD   | Median | IQR  | 25th percentile | 75th percentile |
|------|-------------|------|------|--------|------|-----------------|-----------------|
| 2007 | 8075        | 94.7 | 13.9 | 100.0  | 0.0  | 100.0           | 100.0           |
| 2008 | 8053        | 94.2 | 14.1 | 100.0  | 0.0  | 100.0           | 100.0           |
| 2009 | 8077        | 93.0 | 15.5 | 100.0  | 0.0  | 100.0           | 100.0           |
| 2010 | 8056        | 93.0 | 15.3 | 100.0  | 0.0  | 100.0           | 100.0           |
| 2011 | 8008        | 92.1 | 15.8 | 100.0  | 11.1 | 88.9            | 100.0           |
| 2012 | 7924        | 91.6 | 16.0 | 100.0  | 14.3 | 85.7            | 100.0           |
| 2013 | 7808        | 91.1 | 15.1 | 100.0  | 16.2 | 83.8            | 100.0           |
| 2014 | 7629        | 90.8 | 15.2 | 100.0  | 16.7 | 83.3            | 100.0           |
| 2015 | 7404        | 92.3 | 14.4 | 100.0  | 12.5 | 87.5            | 100.0           |
| 2016 | 7211        | 92.5 | 14.4 | 100.0  | 12.5 | 87.5            | 100.0           |
| 2017 | 6963        | 92.3 | 13.9 | 100.0  | 12.5 | 87.5            | 100.0           |
| 2018 | 6757        | 92.0 | 13.4 | 100.0  | 14.3 | 85.7            | 100.0           |
| 2019 | 6597        | 92.5 | 13.0 | 100.0  | 12.5 | 87.5            | 100.0           |

**Supplementary Table 3: Number of practices excluded and distribution of general practitioner (GP) turnover rates**

| Year | N practices excluded | N practices where turnover was not missing | Mean  | SD    | Median | IQR   | 25th percentile | 75th percentile |
|------|----------------------|--------------------------------------------|-------|-------|--------|-------|-----------------|-----------------|
| 2007 | 118                  | 113                                        | 166.4 | 126.7 | 200.0  | 150.0 | 50.0            | 200.0           |
| 2008 | 177                  | 169                                        | 127.5 | 118.0 | 200.0  | 200.0 | 0.0             | 200.0           |
| 2009 | 222                  | 201                                        | 115.9 | 129.8 | 100.0  | 200.0 | 0.0             | 200.0           |
| 2010 | 265                  | 253                                        | 111.5 | 113.0 | 66.7   | 200.0 | 0.0             | 200.0           |
| 2011 | 299                  | 222                                        | 125.7 | 130.7 | 200.0  | 200.0 | 0.0             | 200.0           |
| 2012 | 164                  | 155                                        | 163.9 | 177.0 | 200.0  | 200.0 | 0.0             | 200.0           |
| 2013 | 153                  | 144                                        | 204.0 | 201.7 | 200.0  | 0.0   | 200.0           | 200.0           |
| 2014 | 244                  | 222                                        | 199.8 | 143.0 | 200.0  | 0.0   | 200.0           | 200.0           |
| 2015 | 219                  | 204                                        | 233.6 | 151.0 | 200.0  | 0.0   | 200.0           | 200.0           |
| 2016 | 345                  | 274                                        | 195.7 | 79.8  | 200.0  | 0.0   | 200.0           | 200.0           |
| 2017 | 391                  | 283                                        | 217.3 | 260.4 | 200.0  | 0.0   | 200.0           | 200.0           |
| 2018 | 369                  | 221                                        | 208.8 | 92.9  | 200.0  | 0.0   | 200.0           | 200.0           |
| 2019 | 269                  | 182                                        | 196.2 | 72.4  | 200.0  | 0.0   | 200.0           | 200.0           |

**Supplementary Table 4: Persistent high turnover (>10%) over 2, 3, 4, or 5 consecutive years.**

| <b>Year</b> | <b>N pract<br/>active 2<br/>years</b> | <b>N prac<br/>persist<br/>high<br/>turnover<br/>2 years</b> | <b>% prop<br/>prac<br/>persist<br/>high<br/>turnover<br/>2 years</b> | <b>N pract<br/>active 3<br/>years</b> | <b>N prac<br/>persist<br/>high<br/>turnover 3<br/>years</b> | <b>% prop<br/>prac<br/>persist<br/>high<br/>turnover<br/>3 years</b> | <b>N pract<br/>active 4<br/>years</b> | <b>N prac<br/>persist<br/>high<br/>turnover 4<br/>years</b> | <b>% prop<br/>prac<br/>persist<br/>high<br/>turnover 4<br/>years</b> | <b>N pract<br/>active 5<br/>years</b> | <b>N prac<br/>persist<br/>high<br/>turnover 5<br/>years</b> | <b>% prop<br/>prac<br/>persist<br/>high<br/>turnover<br/>5 years</b> |
|-------------|---------------------------------------|-------------------------------------------------------------|----------------------------------------------------------------------|---------------------------------------|-------------------------------------------------------------|----------------------------------------------------------------------|---------------------------------------|-------------------------------------------------------------|----------------------------------------------------------------------|---------------------------------------|-------------------------------------------------------------|----------------------------------------------------------------------|
| 2007        | 7906                                  | 478                                                         | 6.0                                                                  | 7798                                  | 210                                                         | 2.7                                                                  | 7691                                  | 109                                                         | 1.4                                                                  | 7601                                  | 57                                                          | 0.7                                                                  |
| 2008        | 7862                                  | 628                                                         | 8.0                                                                  | 7753                                  | 272                                                         | 3.5                                                                  | 7664                                  | 132                                                         | 1.7                                                                  | 7550                                  | 70                                                          | 0.9                                                                  |
| 2009        | 7845                                  | 758                                                         | 9.7                                                                  | 7749                                  | 361                                                         | 4.7                                                                  | 7633                                  | 189                                                         | 2.5                                                                  | 7463                                  | 117                                                         | 1.6                                                                  |
| 2010        | 7845                                  | 832                                                         | 10.6                                                                 | 7725                                  | 408                                                         | 5.3                                                                  | 7547                                  | 231                                                         | 3.1                                                                  | 7345                                  | 142                                                         | 1.9                                                                  |
| 2011        | 7785                                  | 1001                                                        | 12.9                                                                 | 7601                                  | 521                                                         | 6.9                                                                  | 7392                                  | 302                                                         | 4.1                                                                  | 7158                                  | 139                                                         | 1.9                                                                  |
| 2012        | 7615                                  | 1189                                                        | 15.6                                                                 | 7404                                  | 629                                                         | 8.5                                                                  | 7170                                  | 274                                                         | 3.8                                                                  | 6911                                  | 141                                                         | 2.0                                                                  |
| 2013        | 7411                                  | 1307                                                        | 17.6                                                                 | 7175                                  | 523                                                         | 7.3                                                                  | 6917                                  | 263                                                         | 3.8                                                                  | 6711                                  | 144                                                         | 2.1                                                                  |
| 2014        | 7178                                  | 1022                                                        | 14.2                                                                 | 6917                                  | 446                                                         | 6.4                                                                  | 6712                                  | 230                                                         | 3.4                                                                  | 6548                                  | 109                                                         | 1.7                                                                  |
| 2015        | 6897                                  | 834                                                         | 12.1                                                                 | 6692                                  | 378                                                         | 5.6                                                                  | 6527                                  | 190                                                         | 2.9                                                                  | 6527                                  | 98                                                          | 1.5                                                                  |
| 2016        | 6742                                  | 860                                                         | 12.8                                                                 | 6576                                  | 404                                                         | 6.1                                                                  | 6576                                  | 202                                                         | 3.1                                                                  |                                       |                                                             |                                                                      |
| 2017        | 6589                                  | 966                                                         | 14.7                                                                 | 6589                                  | 417                                                         | 6.3                                                                  |                                       |                                                             |                                                                      |                                       |                                                             |                                                                      |
| 2018        | 6590                                  | 946                                                         | 14.4                                                                 |                                       |                                                             |                                                                      |                                       |                                                             |                                                                      |                                       |                                                             |                                                                      |
| 2019        |                                       |                                                             |                                                                      |                                       |                                                             |                                                                      |                                       |                                                             |                                                                      |                                       |                                                             |                                                                      |
